# Supplementary material for: Recommended Immunological Assays to Screen for Ricin-Containing Samples
Source: MDPI journal article supplement (doi:10.3390/toxins7124858), 2015-11-26
Supplement: s1 [file s1]

## Supplementary Materials

**Table S1.** Statistics and definition of  $x_a$ -values for participants who reported quantitative results as “ricin and/or RCA120”.

| Sample | Matrix             | Measurand           | c(Theoretical) * | c(Nominal) ** | $\sigma(\text{Rob})$ | $x_a$ *** | $\sigma_p$ | Unit            |
|--------|--------------------|---------------------|------------------|---------------|----------------------|-----------|------------|-----------------|
| S1     | 0.1% BSA/PBS       | -                   | -                | -             | -                    | -         | -          | -               |
| S2     | 0.1% BSA/PBS       | Ricin and/or RCA120 | 500000           | 572851        | 62686                | 572851    | 146135     | ng/mL           |
| S3     | 0.1% BSA/PBS       | Ricin and/or RCA120 | 500              | 504           | 110                  | 424       | 108        | ng/mL           |
| S4     | skimmed milk       | Ricin and/or RCA120 | 500              | 473           | 96.3                 | 629       | 160        | ng/mL           |
| S5     | 0.1% BSA/PBS       | Ricin and/or RCA120 | 500              | 445           | 65.2                 | 445       | 114        | ng/mL           |
| S6     | 0.1% BSA/PBS       | Ricin and/or RCA120 | 500000           | 589508        | 78055                | 598600    | 152704     | ng/mL           |
| S7     | 0.1% BSA/PBS       | Ricin and/or RCA120 | 0.5              | 0.414         | 0.112                | 0.538     | 0.137      | ng/mL           |
| S8     | meat extract       | Ricin and/or RCA120 | 500              | 484           | 111                  | 626       | 160        | ng/mL           |
| S9     | Organic fertilizer | Ricin and/or RCA120 | -                | 348           | -                    | 318       | 81.2       | $\mu\text{g/g}$ |

\* The “theoretical concentration” was the known concentration of ricin or RCA120 that was spiked into the different matrices. Sample S9 was a naturally contaminated material, the true “theoretical values” were not known; \*\* Robust estimates of mean nominal concentrations as determined experimentally by the organizing laboratory by ELISA for ricin or RCA120, respectively; \*\*\* Consensus mean concentration based on all participants’ reported results as “ricin and/or RCA120” used as “assigned concentration”  $x_a$  are highlighted in green;  $\sigma(\text{rob})$ : robust estimate of the standard deviation of the nominal concentrations;  $\sigma_p$ : standard deviation for proficiency assessment.
